# Supplementary material
Source: publisher figshare collection journal article supplement (https://acs.figshare.com/ndownloader/files/10545055)
Supplement: Supplementary file 1 [file 10545055]

# A Whole Cell *E. coli* Display Platform for Artificial Metalloenzymes: Poly(phenylacetylene) Production with a Rhodium–Nitrobindin Metalloprotein

*Alexander R. Grimm,<sup>†</sup> Daniel F. Sauer,<sup>‡</sup> Tino Polen,<sup>§</sup> Leilei Zhu,<sup>†,⊥</sup> Takashi Hayashi,<sup>||</sup> Jun Okuda,<sup>‡</sup> and Ulrich Schwaneberg<sup>\*,†,#</sup>*

<sup>†</sup>Institute of Biotechnology, RWTH Aachen University, Worringer Weg 3, D-52074 Aachen, Germany

<sup>‡</sup>Institute of Inorganic Chemistry, RWTH Aachen University, Landoltweg 1, D-52056 Aachen, Germany

<sup>§</sup>IBG-1: Biotechnology, Institute of Bio- and Geosciences, Forschungszentrum Jülich GmbH, D-52425 Jülich, Germany

<sup>||</sup>Department of Applied Chemistry, Graduate School of Engineering, Osaka University, 2-1 Yamadaoka, Suita 565-0871, Japan

<sup>#</sup>DWI - Leibniz-Institute for Interactive Materials, Forckenbeckstrasse 50, D-52074 Aachen, Germany

## Corresponding Author

\*E-mail: [u.schwaneberg@biotec.rwth-aachen.de](mailto:u.schwaneberg@biotec.rwth-aachen.de).

## Present Addresses

<sup>⊥</sup>Tianjin Institute of Industrial Biotechnology, Chinese Academy of Sciences, 32 West 7<sup>th</sup> Avenue, Tianjin, China

## SUPPORTING INFORMATION

### General Comments

All chemical experiments were performed under a nitrogen or argon atmosphere using standard Schlenk techniques or a MBraun nitrogen-filled glovebox.  $^1\text{H}$  NMR spectra were recorded on a Bruker Avance III 400 NMR spectrometer. Chemical shifts are reported in ppm relative to the residual solvent resonances<sup>1</sup>. Gel permeation chromatography (GPC) was performed on a TOSOH SC8020 apparatus with a refractive index (RI) detector with a TOSOH TSKGel G5000H HR column. All OD<sub>600</sub> measurements were performed with a BioPhotometer plus device (eppendorf). All cells used in this work were lyophilized for 24 h in a CHRIST Alpha 1-2 LDplus lyophilizer (CHRIST) after the harvested cells were centrifuged (4000 g, 4 °C, 20 min) and frozen at -20 °C. Prior to further processing, all lyophilized cells were rehydrated in swelling buffer for at least 30 min in a process called swelling.

### Experimental Section

**Reagents and media.** The PBS buffer consisted of 140 mM NaCl, 10 mM KCl, 6.4 mM Na<sub>2</sub>HPO<sub>4</sub>, 2 mM KH<sub>2</sub>PO<sub>4</sub>. In cases when BSA-supplemented PBS buffer was employed, 0.2% (w/v) BSA were added. The swelling buffer for the cells consisted of 20 mM Tris, 100 mM NaCl at pH 8. The LB medium employed for genetic engineering and expression was composed of 10 g/l tryptone, 5 g/l yeast extract and 10 g/l NaCl. In the case of LB agar plates, 20 g/l agar were added. The medium was then autoclaved at 121 °C for 20 min. All components were obtained from AppliChem.

**Cloning.** The primers employed for the cloning are listed in Tables S1-S5. The composition of and conditions for the polymerase chain reaction (PCR) experiments are detailed in Tables S6 and S7 respectively. To insert the gene for NB4 (insert) into a pET22 plasmid bearing only the

## SUPPORTING INFORMATION

CSD system (vector), both the insert and vector were first amplified using the primers in Table S1 via PCR (Tables S6-S7). Restriction digestion was performed with NheI-HF (NEB) and AscI (NEB) (Table S8). The mixture was incubated at 37 °C for 6 h. Then, an agarose gel electrophoresis was run (0.8% agarose, 80 V, 90 min) and a gel extraction was performed (see NucleoSpin Gel and PCR Clean-up, Macherey-Nagel). For the ligation a ratio of 1:4 (w:w) of vector to insert was set and the ligation mixture was assembled with 1 µl T4 DNA ligase (400000 units/ml, NEB), 2 µl 10x T4 DNA ligase reaction buffer (NEB), the insert and vector up to 20 µl with ddH<sub>2</sub>O. The ligation mixture was incubated at room temperature for 1 h and then used for transformation. Subsequently, a TEV protease cleavage site was introduced between NB4 and the E-tag antibody binding site via PCR (TEV site encoded in employed primers, Table S3). The EstA esterase used as an autotransporter for cell surface display was inactivated via a substitution in the catalytic triad (serine to alanine; Table S4). Transformation to chemically competent *E. coli* DH5α cells (heat shock at 42 °C, 45 second) and sequencing was performed after every PCR. The final pET22 csdNB4 TEV variant was then transformed to chemically competent *E. coli* BL21 (DE3) gold cells (heat shock at 42 °C, 20 seconds) for expression. As a negative control, the cysteine C96 in csdNB4 TEV was substituted to glutamine via site directed mutagenesis (Table S5).

**Protein expression.** The LB medium employed for genetic engineering, expression pre- and main cultures was composed of 10 g/l tryptone, 5 g/l yeast extract and 10 g/l NaCl. In the case of LB agar plates, 20 g/l agar was added. The medium was then autoclaved at 121 °C for 20 min. All components were obtained from AppliChem. Shake flask expressions started with the inoculation of 10 ml LB<sub>Amp</sub> in a test tube with 2 µl from a glycerol stock of *E. coli* BL21 (DE3) gold pET22b csdNB4 (C96Q) TEV as a preculture. This preculture was shaken at 37 °C, 250

## SUPPORTING INFORMATION

rpm overnight. The preculture was then used to inoculate 50 ml LB<sub>Amp</sub> main culture in a 1 l Erlenmeyer flask to a starting OD<sub>600</sub> of 0.02. The main culture was shaken at 37 °C, 250 rpm, and when the OD<sub>600</sub> had reached 1.3, it was induced with 0.2 mM IPTG. The shaking of the main culture was continued at 18 °C, 250 rpm for 20 hours. The cells were then harvested and centrifuged at 4000 g, 4 °C for 30 min. The cell pellets were frozen at -20 °C.

**Outer membrane fractionation and quantification.** The cells with the outer membrane target protein were resuspended in swelling buffer. They were then sonicated at 40% amplitude 15 second pulses with 15 second breaks, for 5 min – 10 min. The sonicated suspension was then centrifuged at 3220 g, 4 °C, 1 h. The supernatant was subsequently centrifuged at 100,000 g, 4 °C, 30 min. The pellet was resuspended in PBS supplemented with 0.01 mM MgCl<sub>2</sub>, 2% Triton X-100 and incubated at room temperature for 30 min. The suspension was then again centrifuged at 100,000 g, 4 °C, 30 min. The resulting pellet corresponded to the outer membrane fraction and was resuspended in buffer for further use. This method was based on a protocol by Maurer *et al.*<sup>2</sup>. For the quantification of the isolated OMFs, an Experion Automated Electrophoresis Station (Bio-Rad) was employed, with Experion Pro260 Chips (Bio-Rad). Samples for the Experion device were prepared according to the Experion Pro260 Analysis Kit Quick Guide (Bio-Rad). To calculate the number of csdNB4 TEV proteins per cell,  $7 \times 10^8$  *E. coli* cells per ml at an OD<sub>600</sub> of 1 were assumed according to literature<sup>3</sup>.

**Immunofluorescence staining and detection.** For fluorescence staining purposes, a fluorescein derivative-conjugated antibody specific for the E-tag peptide sequence was used (Epitope-Tag Antibody conjugated with FITC, Novus Biologicals). With the E-tag sequence present in csdNB4 TEV, this allowed for fluorescent staining of the expressing cells. First, 10 mg of the lyophilized cells were resuspended in 5 ml PBS with 0.2% BSA and centrifuged at 3200 g,

## SUPPORTING INFORMATION

4 °C, 10 min two times. The cells were then resuspended in 167  $\mu$ l of a 1:100 diluted E-Tag antibody (Epitope-Tag Antibody conjugated with FITC, Novus Biologicals) solution. In the case of the unstained negative control, PBS with 0.2% BSA was used for this step. The cells were incubated on ice for 10 min, after which 8.5 ml PBS with 0.2% BSA was added. The suspension was then centrifuged at 3200 g, 4 °C, 10 min. Finally, the cells were resuspended in the volume of PBS with 0.2% BSA necessary to set OD<sub>600</sub> 75 and used for analysis. For detection with the Tecan Infinite M1000 96-well plate reader (Tecan), the excitation wavelength  $\lambda_{\text{ex}}$  was 495 nm, and the emission wavelength  $\lambda_{\text{em}}$  519 nm.

**TEV cleavage of csdNB4 TEV.** AcTEV Protease (ThermoFisher Scientific) was employed for cleavage of the TEV sequence in the csdNB4 TEV fusion protein based on the following protocol: After outer membrane fractionation, the outer membrane fraction was resuspended in 10 ml swelling buffer and subjected to ultracentrifugation again at 100,000 g, 4 °C, 30 min. The pellet was then resuspended in the digestion mixture composed of 15  $\mu$ l 20x AcTEV buffer (ThermoFisher Scientific), 3  $\mu$ l 0.1 M DTT (ThermoFisher Scientific), 2  $\mu$ l (20 U) AcTEV, 280  $\mu$ l ddH<sub>2</sub>O. The digestion mixture was shaken at 25 °C, 150 rpm, 24 h.

**Rh(cp)(cod) coupling.** Coupling of Rh(cp)(cod) **1** to csdNB4 TEV whole cells was performed in a glovebox under nitrogen atmosphere. 250 mg lyophilized csdNB4 TEV whole cells were resuspended in 10 ml swelling buffer and stirred at 150 rpm, 30 min. 100 equiv. Rh(cp)(cod) **1** in THF (10% (v/v)) were then added to the suspension. The mixture was stirred at 150 rpm, 30 min at room temperature, then centrifuged at 2300 g, 20 min. Three THF wash steps were then performed by discarding the supernatant, resuspending the pellet in 20 ml 50% THF/swelling buffer and centrifuging at 3200 g, 4 °C, 10 min. In case cellular components were extracted during the THF washing procedure, these components would be discarded with the supernatants.

## SUPPORTING INFORMATION

Finally, two buffer wash steps were performed by discarding the supernatant, resuspending the pellet in 20 ml swelling buffer and centrifuging at 3200 g, 4 °C, 20 min.

**ICP-OES quantification of cellular rhodium content.** After coupling of Rh(cp)(cod) **1** to csdNB4 TEV whole cells, the washed cells were lyophilized again and dissolved in 10 ml aqua regia (1 volume HNO<sub>3</sub>, 3 volumes HCl). The mixture was incubated at 100 °C overnight, then filtered (glass frit) for ICP-OES. The obtained ppm values were then converted to mol values and divided by the number of csdNB4 TEV whole cells used for coupling.

**Polymerization of phenylacetylene.** After coupling, the ArMt bugs were resuspended in 5 ml swelling buffer, 100 µl phenylacetylene **3** were added and the reaction mixture was stirred at 150 rpm, 12 h at room temperature under air. After reaction time indicated, 100 eq. acetic acid were added to quench the catalyst. The polymer and the monomer were extracted with chloroform, dried over magnesium sulfate and dried under vacuum. The obtained polymer was analyzed by <sup>1</sup>H NMR spectroscopy in CDCl<sub>3</sub> prior by analysis with GPC in THF.

## SUPPORTING INFORMATION

### Results

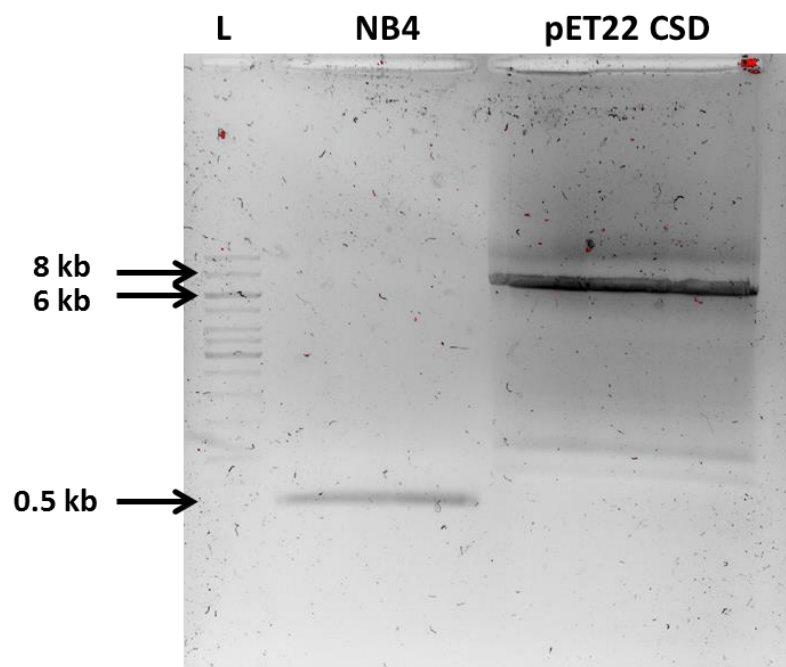

**Figure S1.** NB4 insert and pET22 CSD after restriction enzyme digestion. L: Ladder (GeneRuler™ 1 kb DNA Ladder (Thermo Scientific)).

## SUPPORTING INFORMATION

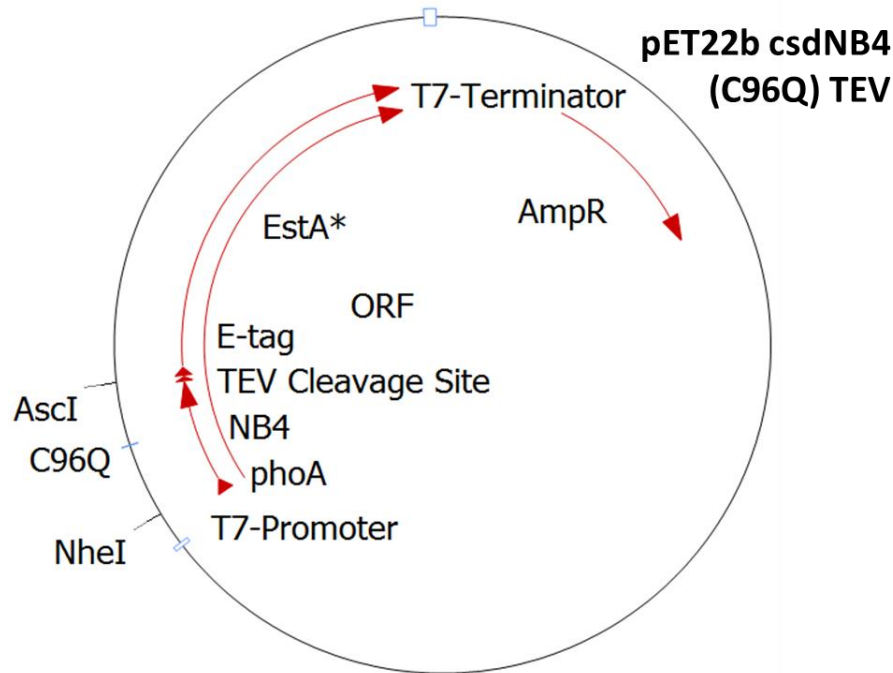

**Figure S2.** Vector maps for cell surface display of nitrobindin variant NB4. The amino acid sequence of the csdNB4 TEV fusion protein is given below (legend: **phoA leader**, **NB4**, **TEV site**, **E-tag**, **EstA\***).

**MKQSTIALALLPLLFTPVTKA**AS**NQLQQ**LQNPGESPPVHPFVAPLSYLLGTWRGQGEGE  
 YPTIPSFYRGEEIRFSHSGKPVIAYTQKTWKLESGAPLLAESGYFRPRPDGSIEVVACSTG  
 LVEVQKGTYNVDEQSIKLKSDLVGNASKVKEISREFELVDGKLSYVVRLSTTTNPLQPLL  
 KAILDKLGS**ENLYFQ**SG**GAPVPYPDPLEPR**AAS**APSPYSTLVVFGDALSDAGQFPDPAG**  
**PAGSTSRFTN**RVGPTYQNGSGE**IFGPTAPM**LLGNQLGIAPGD**LAAS**TPVNAQQGIADGN  
 NWAVGGYRTDQIYDSITAANGSLIERDNTLLRSRDGYLVDRARQGLGADPNALYYITG  
 GGNDFLQGRILNDVQAQQAAGRLVDSVQALQQAGARYIVVWLLPDLGLTPATFGGPLQ  
 PFASQLSGTFNAELTAQLSQAGANVIPLNIPLLLKEGMANPASFGLAADQN**LIGTCFSGN**  
 GCTMNPTYGINGSTPDPSKLLFND**SVHPTITGQR**LIADY**TYSLLSAPWELTLLPEMAHGT**  
 LRAYQDELRSQWQADWENWQNVGQWRGFVGGGGQRLDFDSQDSAASGDGNGYNLT  
 LGGSYRIDEAWRAGVAAGFYRQKLEAGAKDSDYRMNSYMASAFVQYQENRWWADA  
 ALTGGYLDYDDLKRKFALGGGERSEKGD**TNGHLWAFSAR**LG**YDIAQQADSPWHLSPF**  
 VSADYARVEVDGYSEKGASATALDYDDQKRSSKRLGAGLQ**GKYAFGSDTQ**LFAEYAH  
 EREYEDDTQDLTMSLNSLPGNRFTLEGYTPQDHLNRVSLGFSQKL**APELSLRGGYNWR**  
 KGEDDTQQSVSLALSLDF



## SUPPORTING INFORMATION

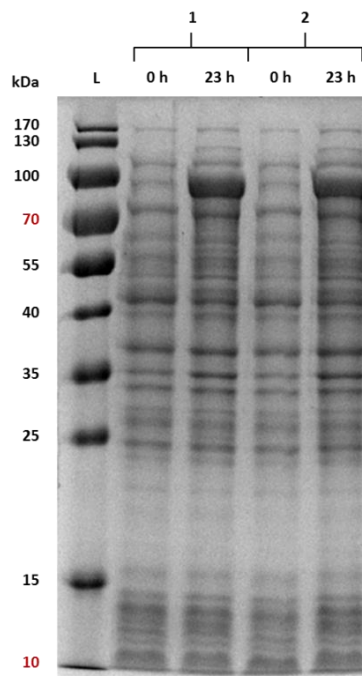

**Figure S3.** SDS-PAGE of two csdNB4 TEV expressions (1, 2). The molecular weight of csdNB4 TEV was calculated to be 90524.62 g/mol (ExpASy ProtParam tool). L: Ladder (PageRuler™ Prestained Protein Ladder (Thermo Scientific)).

## SUPPORTING INFORMATION

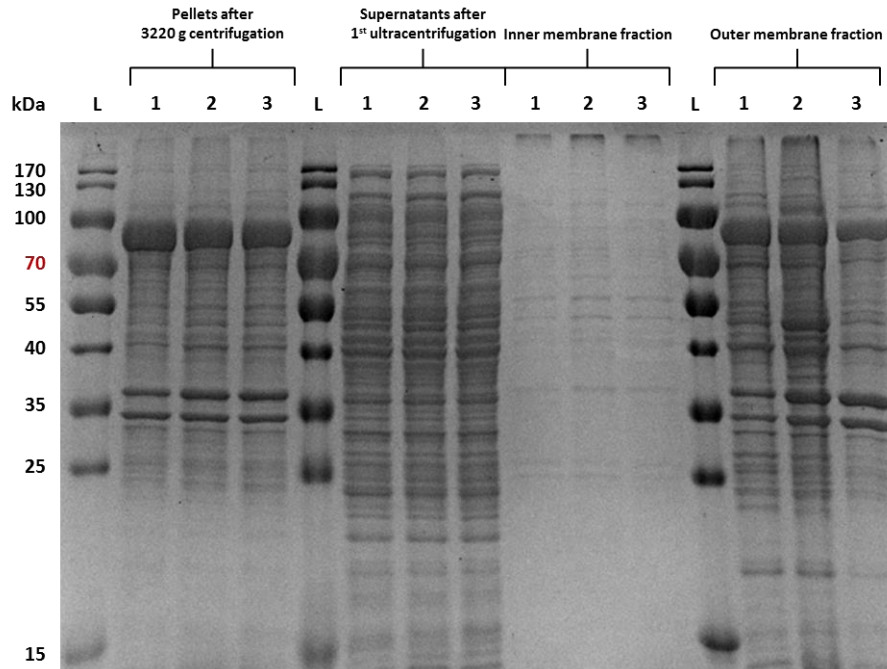

**Figure S4.** SDS-PAGE of samples taken during outer membrane fractionation of three csdNB4 TEV expression batches (batch 1, batch 2, batch 3). 100 mg lyophilized cells of each batch were used for outer membrane fractionation. L: Ladder (PageRuler™ Prestained Protein Ladder (Thermo Scientific)). Samples from left to right: Pellets after slow 3220 g centrifugation (= cell debris); Supernatants after first 100,000 g ultracentrifugation; Supernatants after second 100,000 g ultracentrifugation (= inner membrane fraction); Pellets after second 100,000 g ultracentrifugation (= outer membrane fraction). Protocol according to Maurer *et al.*<sup>2</sup>.

## SUPPORTING INFORMATION

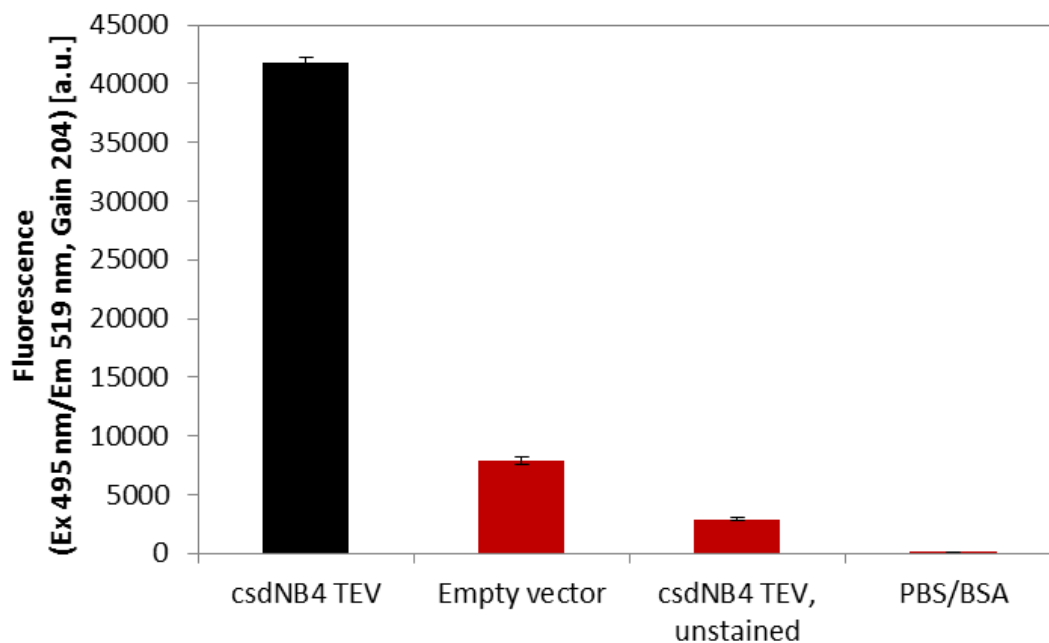

**Figure S5.** Immunofluorescence staining of csdNB4 TEV whole cells. Red columns represent negative controls. OD<sub>600</sub> 75 was set for all cell samples. Fluorescence exhibited by unstained csdNB4 TEV cells is expected to be mainly caused by endogenous flavins<sup>4</sup>. To evaluate the extent of periplasmic display of outer membrane csdNB4 TEV, an E-tag antibody staining was also performed with csdNB4 TEV whole cells and subsequently again with the isolated outer membrane fraction. The membrane fraction experiment shows a < 10% increase in fluorescence after washing (1462 a.u. after staining of whole cells, 1590 a.u. after staining of isolated membrane fraction; Tecan Infinite M200 plate reader,  $\lambda_{\text{ex}}$  490 nm,  $\lambda_{\text{em}}$  525 nm, gain 142). The low difference in fluorescence intensity is a strong indication that most of the outer membrane csdNB4 TEV is displayed on the *E. coli* cell surface.

## SUPPORTING INFORMATION

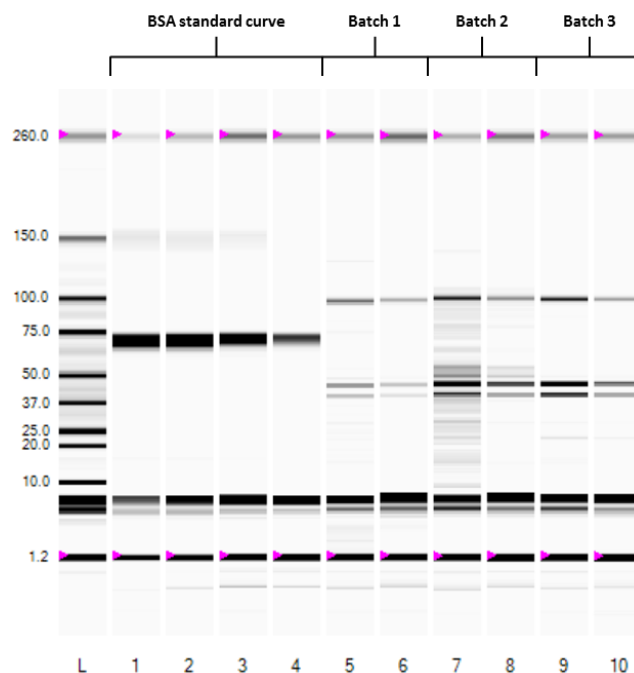

**Figure S6.** Experion results of outer membrane fractionation of *E. coli* BL21 (DE3) gold pET22 csdNB4 TEV. Quantification procedure of outer membrane fraction described in “outer membrane fractionation and quantification” in the experimental section, also see calculation in caption of Figure S7.

## SUPPORTING INFORMATION

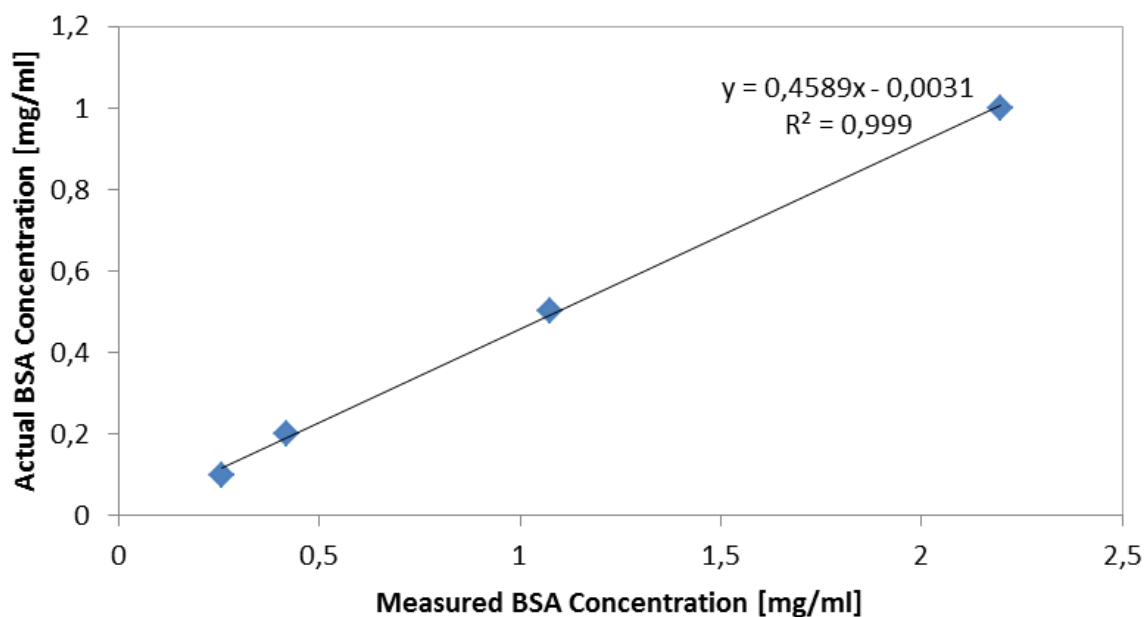

**Figure S7.** BSA standard curve with Experion. Using the equation of the BSA standard curve (actual BSA concentration [mg/ml] =  $0.4589 \cdot \text{measured BSA concentration [mg/ml]} - 0.0031$ ), the csdNB4 TEV content in relation to the lyophilized cell mass in three expression batches was determined to be 0.14%, 0.31% and 0.26%. The resulting average of 0.24% ( $\text{g}_{\text{csdNB4 TEV}}/\text{g}_{\text{lyophilized cells}}$ ) was then converted to a molar concentration of 26.23  $\text{nmol}_{\text{csdNB4 TEV}}/\text{g}_{\text{lyophilized cells}}$ . At an *E. coli* cell density of  $7 \cdot 10^8$  cells/ml at an  $\text{OD}_{600}$  of 1, that corresponds to approximately 12867 csdNB4 TEV molecules per *E. coli* cell<sup>3</sup>.

## SUPPORTING INFORMATION

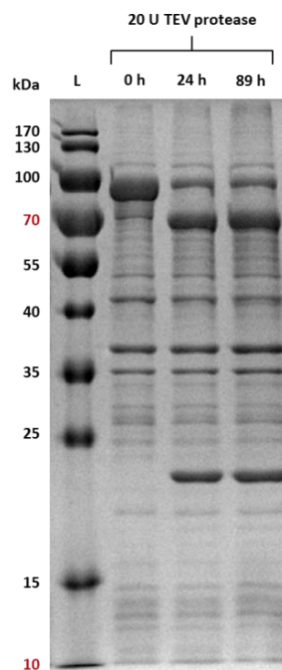

**Figure S8.** TEV cleavage of OMF csdNB4 TEV. A band corresponding in size to the cleaved NB4 domain appears after 24 h incubation of outer membrane fraction csdNB4 TEV with 20 U TEV protease (calculated: 21581.7 g/mol). L: Ladder (PageRuler™ Prestained Protein Ladder (Thermo Scientific)).

## SUPPORTING INFORMATION

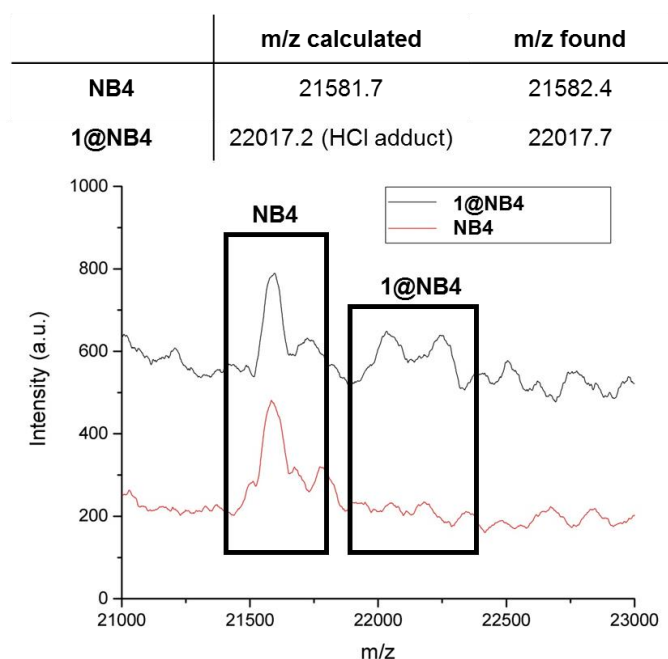

**Figure S9.** MALDI-ToF-MS spectra of uncoupled and coupled TEV-cleaved NB4 in outer membrane fraction using 100 mg lyophilized cells after TEV protease cleavage. The twin peaks in the coupled **1@NB4** sample is expected to result from cleavage of the cyclooctadiene (cod) ligand from Rh(cp)(cod) **1** during MS analysis.

## SUPPORTING INFORMATION

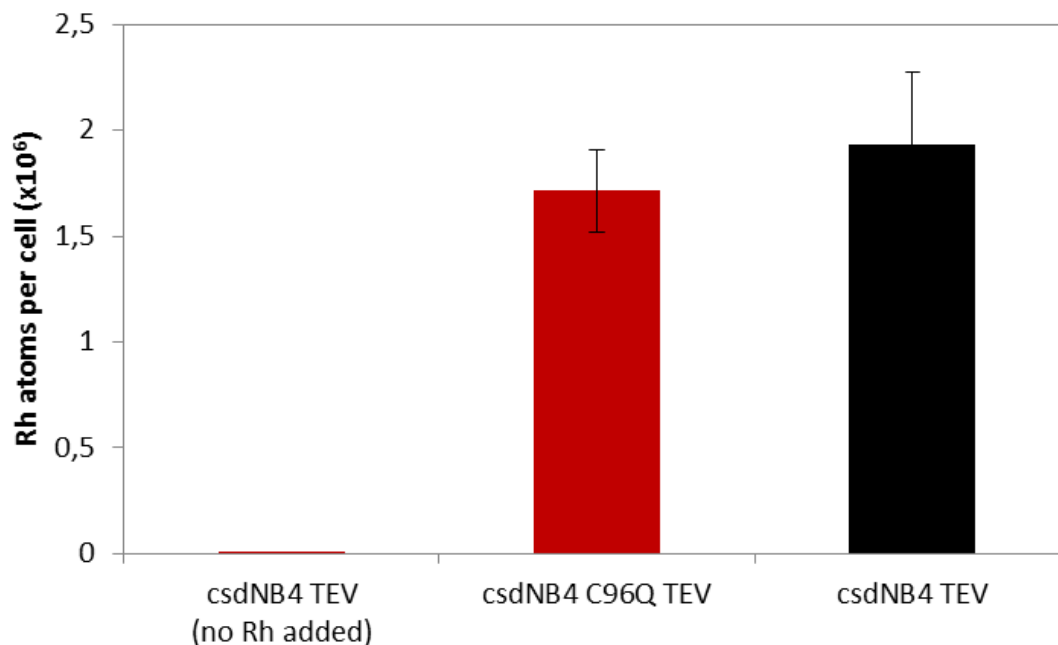

**Figure S10.** ICP-OES quantification of cellular Rh content. While coupled csdNB4 TEV whole cells (ArMt bugs; black bar) produced 80% *trans* polyphenylacetylene (TON per cell =  $39 \times 10^6$  cell<sup>-1</sup>, Table 1, entry 5), no product formation could be detected with coupled csdNB4 C96Q TEV whole cells (Table 1, entry 6; red bar). csdNB4 C96Q TEV differs from csdNB4 TEV in one respect only: It does not contain the cysteine residue at position 96 in NB4 which is necessary for covalent coupling of the maleimide-bearing Rh(cp)(cod) catalyst. By employing *E. coli* cells with displayed csdNB4 C96Q TEV instead of empty vector cells, differences (e.g. unspecific binding in the hydrophobic NB4 cavity) between the negative control (csdNB4 C96Q TEV) and the cells displaying csdNB4 TEV are minimized. As an additional negative control, no Rh(cp)(cod) catalyst 1 was added to the csdNB4 TEV whole cells.



## SUPPORTING INFORMATION

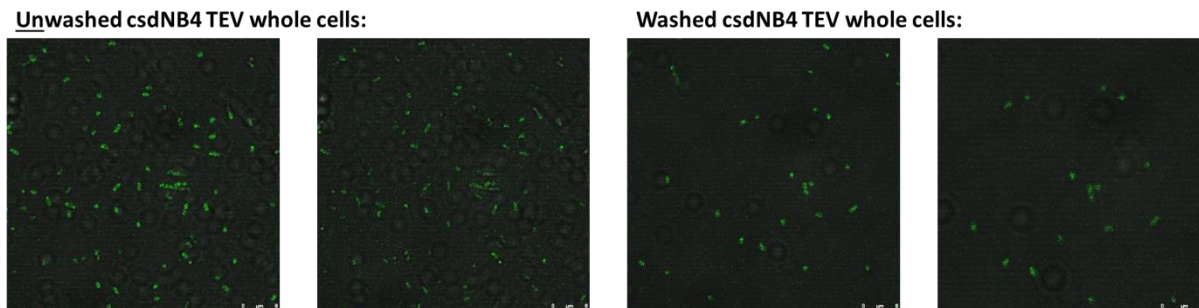

**Figure S11.** Washed and unwashed (control) *E. coli* csdNB4 TEV whole cells to show what the cells look like after the washing procedure (see “Rh(cp)(cod) coupling” in the experimental section). Lyophilized *E. coli* csdNB4 TEV whole cells were stained with 15  $\mu$ M ThioGlo<sup>®</sup>-1 and analyzed with a TCS SP8 confocal microscope ( $\lambda_{\text{ex}}$  = 485 nm, argon laser intensity = 4%,  $\lambda_{\text{em}}$  = 520 nm, gain = 1250, HyD1 detector; Leica Microsystems CMS GmbH, Mannheim, Germany). Transmission and fluorescence images were generated and overlaid with the Leica Application Suite X software.

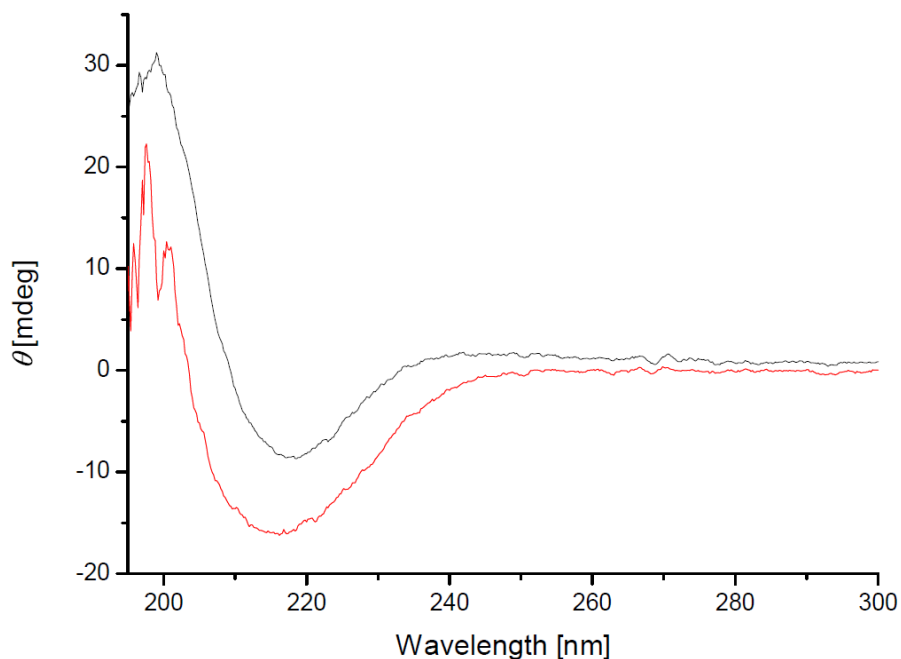

**Figure S12.** CD spectra of 1 mg/ml NB4 in 20 mM Tris, 50 mM NaCl, pH 8 (black) and 50% THF (red).

## SUPPORTING INFORMATION

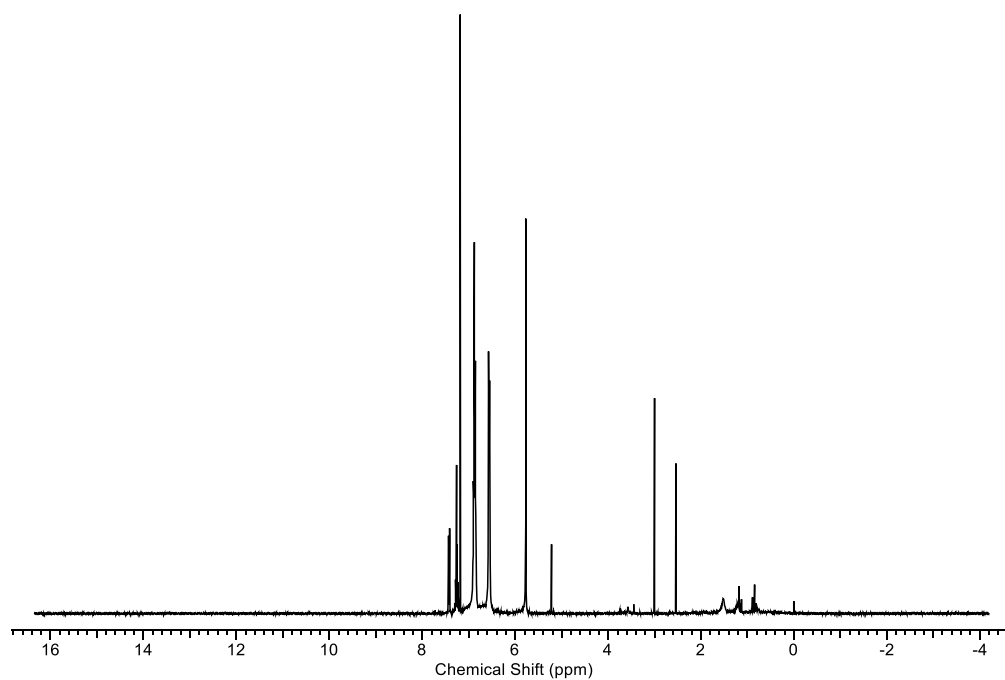

**Figure S13.** Representative  $^1\text{H}$  NMR spectrum (400 MHz,  $\text{CDCl}_3$ , 23  $^\circ\text{C}$ ) of *cis* polyphenylacetylene (Table S9, entry 1).

## SUPPORTING INFORMATION

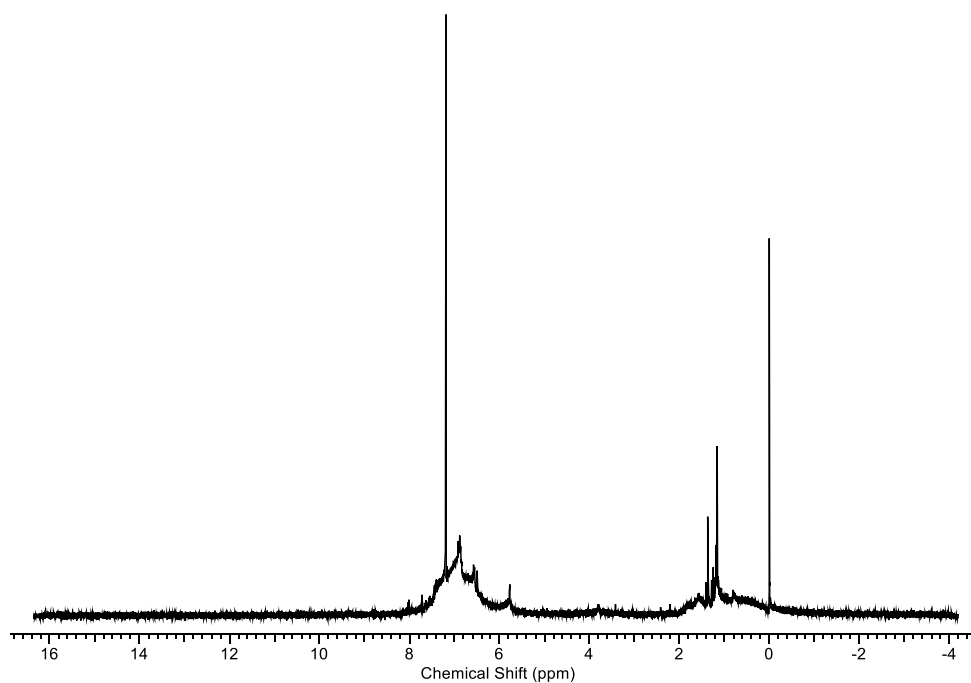

**Figure S14.** Representative  $^1\text{H}$  NMR spectrum (400 MHz,  $\text{CDCl}_3$ , 23  $^\circ\text{C}$ ) of *trans* polyphenylacetylene produced by ArMt bugs (80% *trans*; Table S9, entry 6).

## SUPPORTING INFORMATION

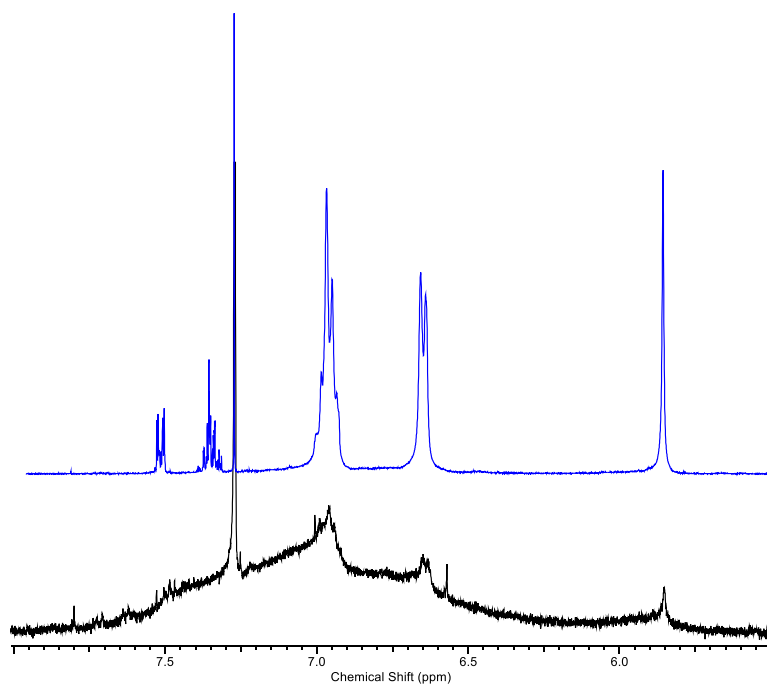

**Figure S15.** Comparison of  $^1\text{H}$  NMR spectra (400 MHz,  $\text{CDCl}_3$ , 23  $^\circ\text{C}$ ) of *cis* (blue) and *trans* (black) polyphenylacetylene.

## SUPPORTING INFORMATION

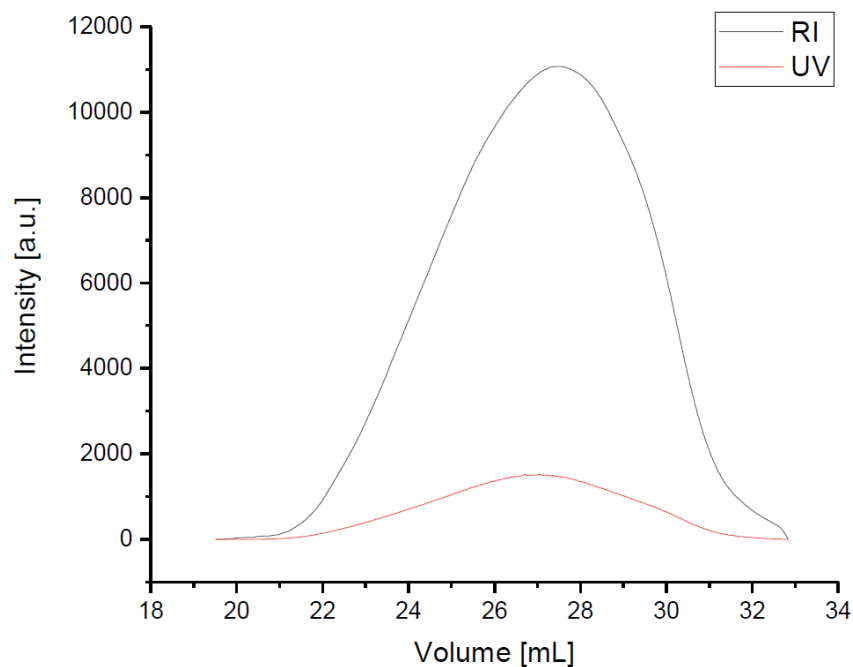

**Figure S16.** GPC trace of polyphenylacetylene produced by ArMt bugs (Table S9, entry 6).

**Table S1.** Primers for the amplification of pET22 CSD vector and NB4 insert.

| Primer     | Sequence (5' → 3')                  | T <sub>m</sub> |
|------------|-------------------------------------|----------------|
| FWD vector | AAT GGC GCG CCG GTG CCG             | 65.1 °C        |
| REV vector | AAA GCT AGC CGC TTT GGT CAC CGG     | 66.1 °C        |
| FWD insert | GGG GCT AGC AAT CAA CTG CAA CAA CTG | 66.5 °C        |
| REV insert | AAA GGC GCG CCC AGT TTG TCC AGG     | 67.8 °C        |

## SUPPORTING INFORMATION

**Table S2.** Primers for the deletion of excess bases at either end of the NB4 gene in the CSD construct on pET22. The primers were named after the restriction site in the proximity of which the excess bases were observed.

| Primer   | Sequence (5' → 3')                          | T <sub>m</sub> |
|----------|---------------------------------------------|----------------|
| FWD NheI | ACC AAA GCG GCT AGC AAT CAA CTG CAA CAA CTG | 69.5 °C        |
| REV NheI | CAG TTG TTG CAG TTG ATT GCT AGC CGC TTT GGT | 69.5 °C        |
| FWD AscI | AAA CTG GGC GCG CCG GTG CCG TAT C           | 71.2 °C        |
| REV AscI | GAT ACG GCA CCG GCG CGC CCA GTT T           | 71.2 °C        |

**Table S3.** Primers for the insertion of TEV cleavage site in pET22 csdNB4.

| Primer | Sequence (5' → 3')                                                                             | T <sub>m</sub> |
|--------|------------------------------------------------------------------------------------------------|----------------|
| FWD    | C ATC CTG GAC AAA CTG GGC AGC GAA AAC CTG TAC<br>TTC CAG GGG AGC GGC GGC GCG CCG GTG CCG TAT C | > 75 °C        |
| REV    | G ATA CGG CAC CGG CGC GCC GCC GCT CCC CTG GAA<br>GTA CAG GTT TTC GCT GCC CAG TTT GTC CAG GAT G | > 75 °C        |

**Table S4.** Primers for the inactivation of esterase in pET22 csdNB4 TEV.

| Primer | Sequence (5' → 3')              | T <sub>m</sub> |
|--------|---------------------------------|----------------|
| FWD    | G TTT GGC GAT GCG CTG AGC GAT G | 66 °C          |
| REV    | C ATC GCT CAG CGC ATC GCC AAA C | 66 °C          |

## SUPPORTING INFORMATION

**Table S5.** Primers for the removal of the covalent coupling site (C96Q) in NB4, in pET22 csdNB4 TEV.

| Primer   | Sequence (5' → 3')            | T <sub>m</sub> |
|----------|-------------------------------|----------------|
| FWD C96Q | GTT ATC GCA CAG TCG ACC GGT C | 64 °C          |
| REV C96Q | G ACC GGT CGA CTG TGC GAT AAC | 64 °C          |

**Table S6.** General PCR Mixture Composition.

| Component          | Stock Concentration  | Volume [μl] |
|--------------------|----------------------|-------------|
| PfuS buffer        | 10x                  | 5           |
| Primer             | 10 μM                | 2           |
| dNTPs              | 10 mM                | 1           |
| Template           | 20 ng/μl – 100 ng/μl | 1           |
| ddH <sub>2</sub> O | -                    | 38.5        |
| PfuS               | 2 U/μl               | 0.5         |
| Total volume       |                      | 50          |

## SUPPORTING INFORMATION

**Table S7.** General PCR Protocol with PfuS. Highlighted cycle (denaturation, annealing, elongation) was repeated 25 times.

| Step                 | Temperature                  | Duration    |
|----------------------|------------------------------|-------------|
| Initial denaturation | 98 °C                        | 2 min       |
| Denaturation         | 98 °C                        | 10 sec      |
| Annealing            | Primer T <sub>m</sub> – 5 °C | 30 sec      |
| Elongation           | 72 °C                        | 30 sec/kb   |
| Final elongation     | 72 °C                        | 2*30 sec/kb |
| Cooling              | 4 °C                         | -           |

**Table S8.** Restriction mixture for cloning of NB4 into pET22 CSD.

| Component                        | Stock Concentration | Volume [μl] |
|----------------------------------|---------------------|-------------|
| Amplified DNA (insert or vector) | -                   | 40          |
| NheI-HF                          | 10,000 units/ml     | 1           |
| AscI                             | 10,000 units/ml     | 1           |
| 10x CutSmart buffer              | 10x                 | 5           |
| ddH <sub>2</sub> O               | -                   | 3           |
| Total volume                     |                     | 50          |



## SUPPORTING INFORMATION

**Table S9.** Results for polymerization of phenylacetylene.

| <div style="display: flex; align-items: center; justify-content: space-around;"> <div style="text-align: center;"> 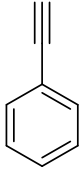 <p><b>3</b></p> </div> <div style="text-align: center;"> <p>[Catalyst]</p> <p>Water, TRIS buffer<br/>(20 mM, pH = 8.0)<br/>25 °C, 12 h</p> </div> <div style="display: flex; align-items: center;"> <div style="text-align: center;">  <p><i>trans</i>-4</p> </div> <div style="margin: 0 10px;">+</div> <div style="text-align: center;">  <p><i>cis</i>-4</p> </div> </div> </div> |                   |     |                   |                           |       |     |            |                   |
|----------------------------------------------------------------------------------------------------------------------------------------------------------------------------------------------------------------------------------------------------------------------------------------------------------------------------------------------------------------------------------------------------------------------------------------------------------------------------------------------------------------------------------------------------------------------------------------------------------------------------------------------------------------------------------------------------------------------------------------------------------------|-------------------|-----|-------------------|---------------------------|-------|-----|------------|-------------------|
| Entry                                                                                                                                                                                                                                                                                                                                                                                                                                                                                                                                                                                                                                                                                                                                                          | Protein           | Rh  | Coupling Time (h) | <i>cis</i> : <i>trans</i> | $M_n$ | PDI | Yield (mg) | Reaction Time (h) |
| 1 <sup>a</sup>                                                                                                                                                                                                                                                                                                                                                                                                                                                                                                                                                                                                                                                                                                                                                 | -                 | Yes | -                 | 95 : 5                    | 6400  | 3.0 | 50         | 12                |
| 2 <sup>b</sup>                                                                                                                                                                                                                                                                                                                                                                                                                                                                                                                                                                                                                                                                                                                                                 | -                 | Yes | -                 | 93 : 7                    | 22900 | 2.6 | -          | 24                |
| 3 <sup>c</sup>                                                                                                                                                                                                                                                                                                                                                                                                                                                                                                                                                                                                                                                                                                                                                 | Mb(A125C)         | Yes | 0.5               | 91 : 9                    | 46500 | 2.3 | 0.1040     | 12                |
| 4 <sup>c</sup>                                                                                                                                                                                                                                                                                                                                                                                                                                                                                                                                                                                                                                                                                                                                                 | NB4               | Yes | 0.5               | 18 : 82                   | 38900 | 2.4 | 0.0065     | 12                |
| 5                                                                                                                                                                                                                                                                                                                                                                                                                                                                                                                                                                                                                                                                                                                                                              | csdNB4            | -   | -                 | -                         | -     | -   | -          | 12 or 96          |
| 6 <sup>d</sup>                                                                                                                                                                                                                                                                                                                                                                                                                                                                                                                                                                                                                                                                                                                                                 | csdNB4 TEV        | Yes | 0.5               | 20 : 80                   | 7600  | 2.7 | 2.1        | 12                |
| 7 <sup>e</sup>                                                                                                                                                                                                                                                                                                                                                                                                                                                                                                                                                                                                                                                                                                                                                 | csdNB4 TEV        | Yes | 0.5               | -                         | -     | -   | -          | 12                |
| 8                                                                                                                                                                                                                                                                                                                                                                                                                                                                                                                                                                                                                                                                                                                                                              | csdNB4 C96Q TEV   | -   | -                 | -                         | -     | -   | -          | 12                |
| 9                                                                                                                                                                                                                                                                                                                                                                                                                                                                                                                                                                                                                                                                                                                                                              | csdNB4 C96Q TEV   | Yes | 1 or 24           | -                         | -     | -   | -          | 12                |
| 10                                                                                                                                                                                                                                                                                                                                                                                                                                                                                                                                                                                                                                                                                                                                                             | Intracellular NB4 | Yes |                   | -                         | -     | -   | -          | -                 |
| 11                                                                                                                                                                                                                                                                                                                                                                                                                                                                                                                                                                                                                                                                                                                                                             | pET22             | -   | -                 | -                         | -     | -   | -          | 12                |
| 12                                                                                                                                                                                                                                                                                                                                                                                                                                                                                                                                                                                                                                                                                                                                                             | pET22             | Yes | 1 or 24           | -                         | -     | -   | -          | 12                |
| 13 <sup>f</sup>                                                                                                                                                                                                                                                                                                                                                                                                                                                                                                                                                                                                                                                                                                                                                | -                 | -   | -                 | -                         | -     | -   | -          | -                 |
| 14 <sup>g</sup>                                                                                                                                                                                                                                                                                                                                                                                                                                                                                                                                                                                                                                                                                                                                                | -                 | -   | -                 | -                         | -     | -   | -          | -                 |

Extending of the reaction to 24 h did not lead to a significant increase of the molecular weight  $M_n$ . <sup>a</sup> $\Delta$ yield = 1 mg. <sup>b</sup>Onoda *et al.* (2012)<sup>5</sup>. <sup>c</sup>Fukumoto *et al.* (2014)<sup>6</sup>. <sup>d</sup> $\Delta M_n = \pm 34\%$ ,  $\Delta$ PDI =  $\pm 29\%$ .  $\Delta$ yield = 0.3 mg. <sup>e</sup>No rehydration (swelling) of lyophilized csdNB4 TEV whole cells before coupling. <sup>f</sup>Water. <sup>g</sup>Tris buffer.

## SUPPORTING INFORMATION

### REFERENCES

- (1) Fulmer, G. R.; Miller, A. J. M.; Sherden, N. H.; Gottlieb, H. E.; Nudelman, A.; Stoltz, B. M.; Bercaw, J. E.; Goldberg, K. I. Nmr Chemical Shifts of Trace Impurities: Common Laboratory Solvents, Organics, and Gases in Deuterated Solvents Relevant to the Organometallic Chemist. *Organometallics* 2010, 29, 2176-2179.
- (2) Maurer, J.; Jose, J.; Meyer, T. F. Autodisplay: One-Component System for Efficient Surface Display and Release of Soluble Recombinant Proteins from Escherichia Coli. *J. Bacteriol.* 1997, 179, 794-804.
- (3) Sezonov, G.; Joseleau-Petit, D.; D'Ari, R. Escherichia Coli Physiology in Luria-Bertani Broth. *J. Bacteriol.* 2007, 189, 8746-8749.
- (4) Yang, L.; Zhou, Y.; Zhu, S.; Huang, T.; Wu, L.; Yan, X. Detection and Quantification of Bacterial Autofluorescence at the Single-Cell Level by a Laboratory-Built High-Sensitivity Flow Cytometer. *Anal. Chem.* 2012, 84, 1526-1532.
- (5) Onoda, A.; Fukumoto, K.; Arlt, M.; Bocola, M.; Schwaneberg, U.; Hayashi, T. A Rhodium Complex-Linked B-Barrel Protein as a Hybrid Biocatalyst for Phenylacetylene Polymerization. *Chem. Commun.* 2012, 48, 9756-9758.
- (6) Fukumoto, K.; Onoda, A.; Mizohata, E.; Bocola, M.; Inoue, T.; Schwaneberg, U.; Hayashi, T. Rhodium-Complex-Linked Hybrid Biocatalyst: Stereo-Controlled Phenylacetylene Polymerization within an Engineered Protein Cavity. *ChemCatChem* 2014, 6, 1229-1235.
